# Supplementary material
Source: publisher site journal article supplement (https://www.dovepress.com/article/299969)

**Supplementary figure 1 DEMs in the GSE51674 dataset.** Heat Map showing a distinguishable expression profile of miRNAs between kidney tissues from patients with mild and serious renal diseases.

**
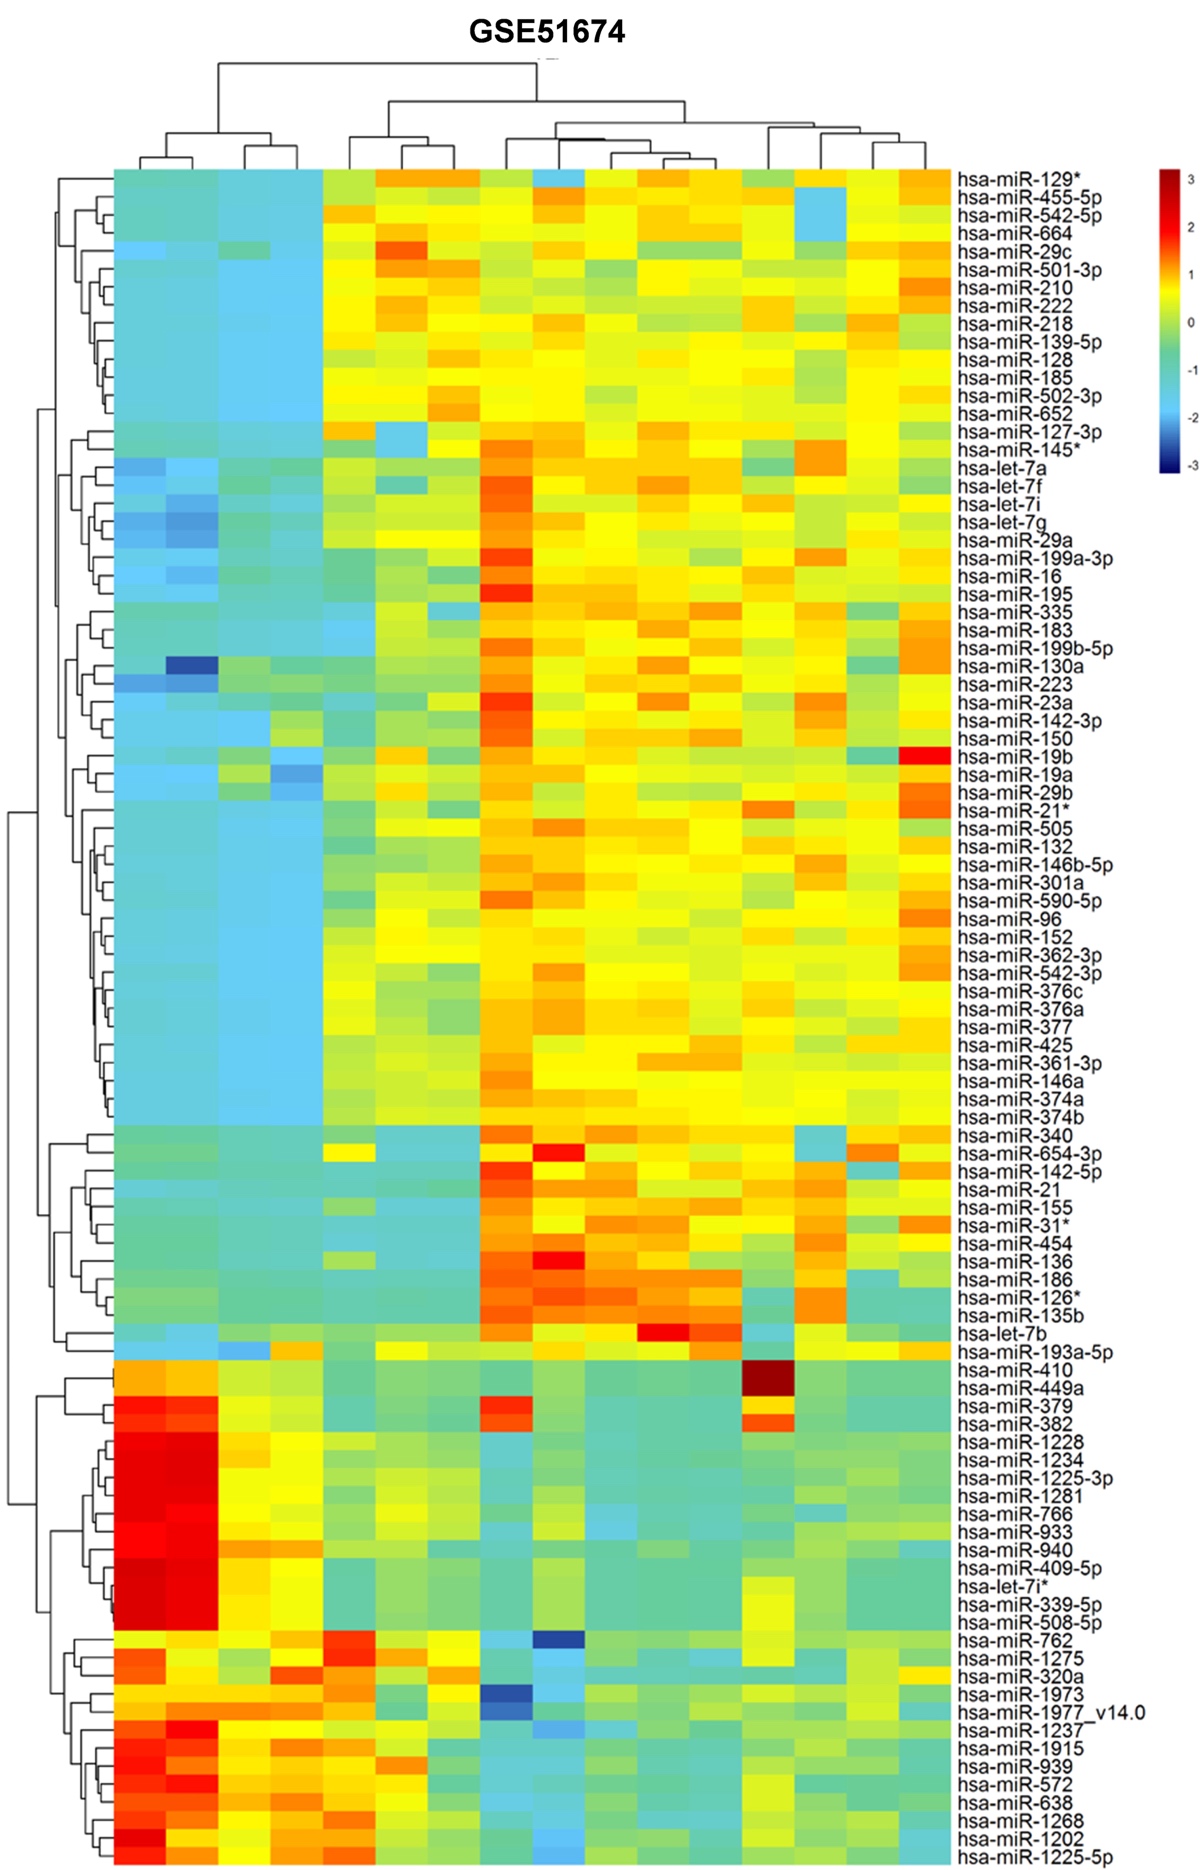
**

**Supplementary figure 2 DEMs in the GSE42648 dataset.** Heat Map showing a distinguishable expression profile of miRNAs between kidney tissues from patients with mild and serious renal diseases.

**
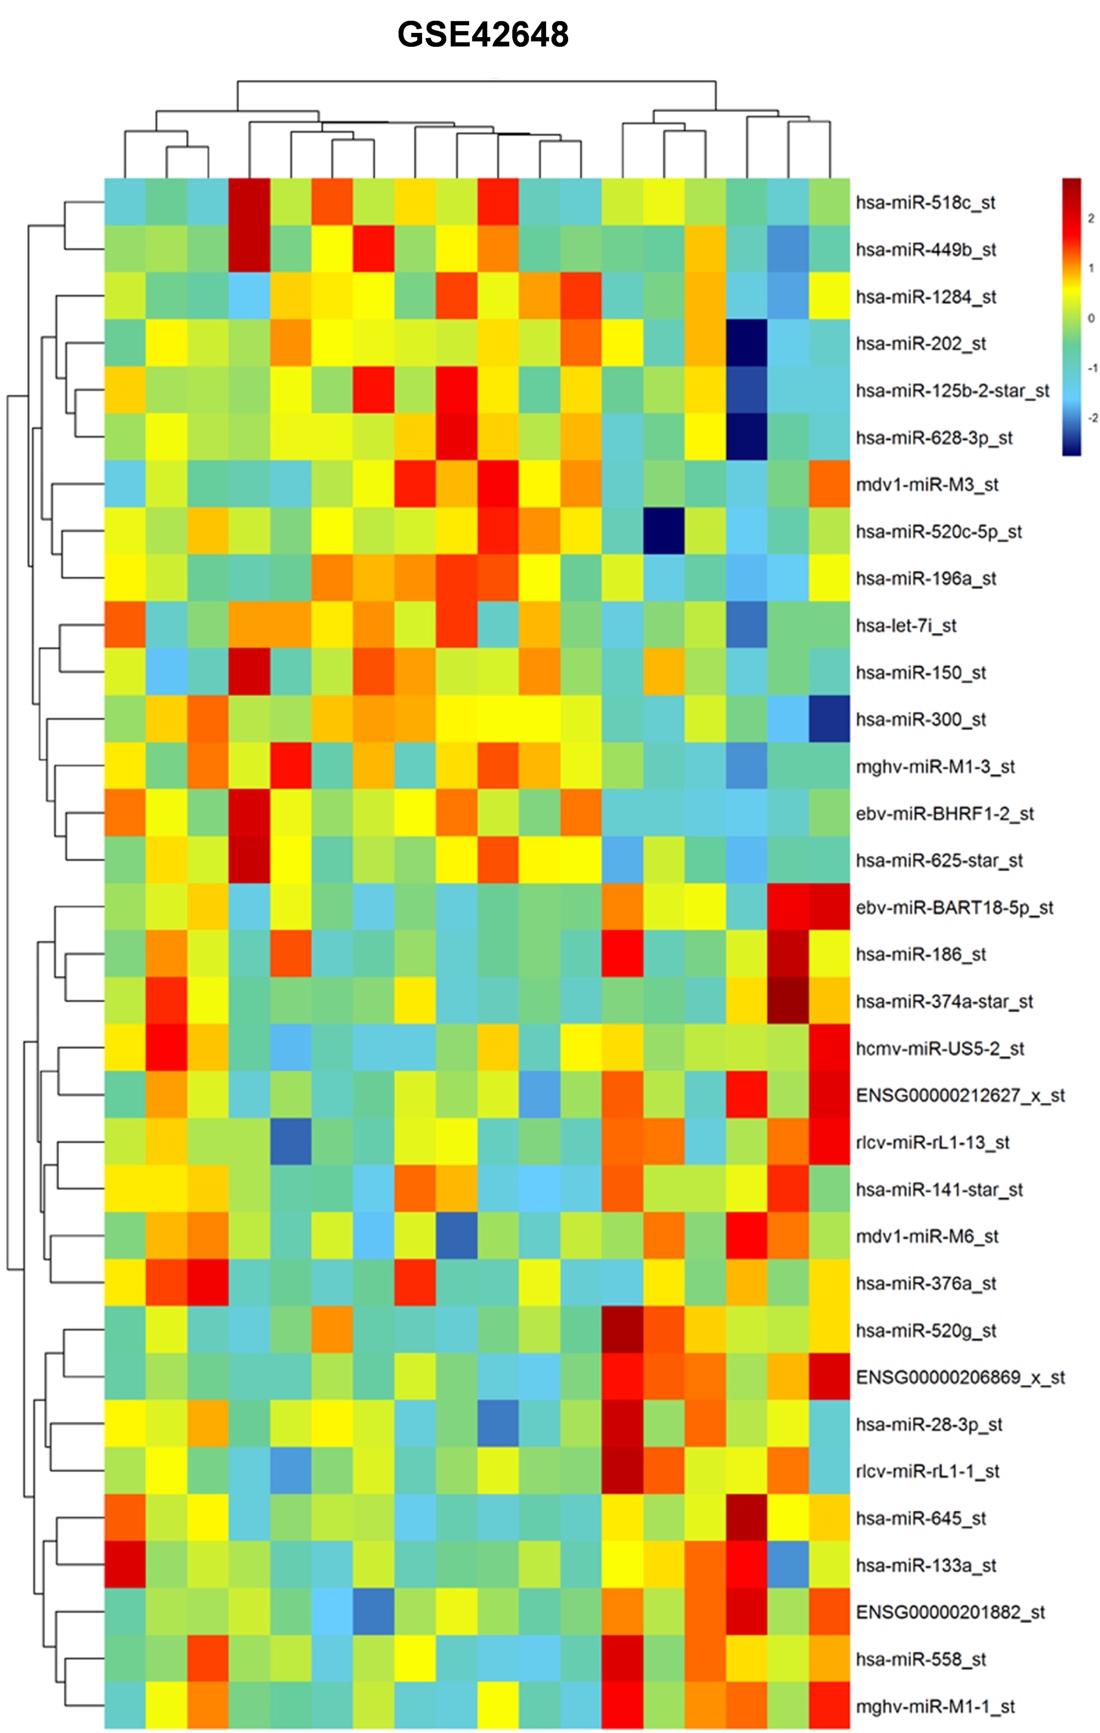
**

**Supplementary figure 3 The existing pattern of extracellular let-7i-5p.** RT-qPCR was used to detect the level of let-7i-5p in the CM of MSCs/let-7i-5p treated with RNase (2 mg/ml) alone or combined with Triton X-100 (0.1%) for 20 min (n = 3). **P < 0.01, compared with the control group.


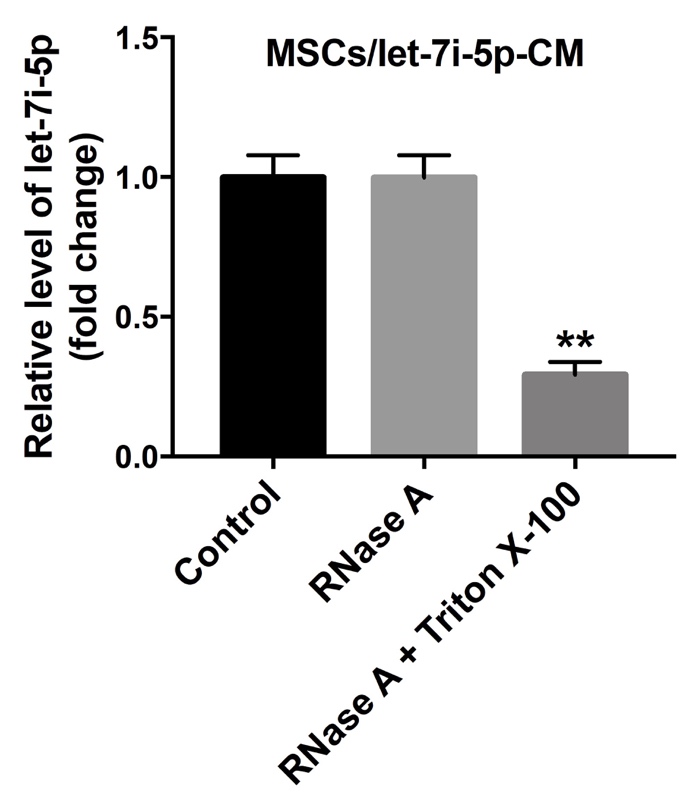

Supplement: Supplementary file 1 [file get_supplementary_file.php]
